# Supplementary material for: Directional Amplification at Rock Sites in Fault Damage Zones
Source: MDPI journal article supplement (doi:10.3390/app13106060), 2023-05-15
Supplement: s1 [file s1]

# THE MATTINATA FAULT

## GROUND MOTION POLARIZATION

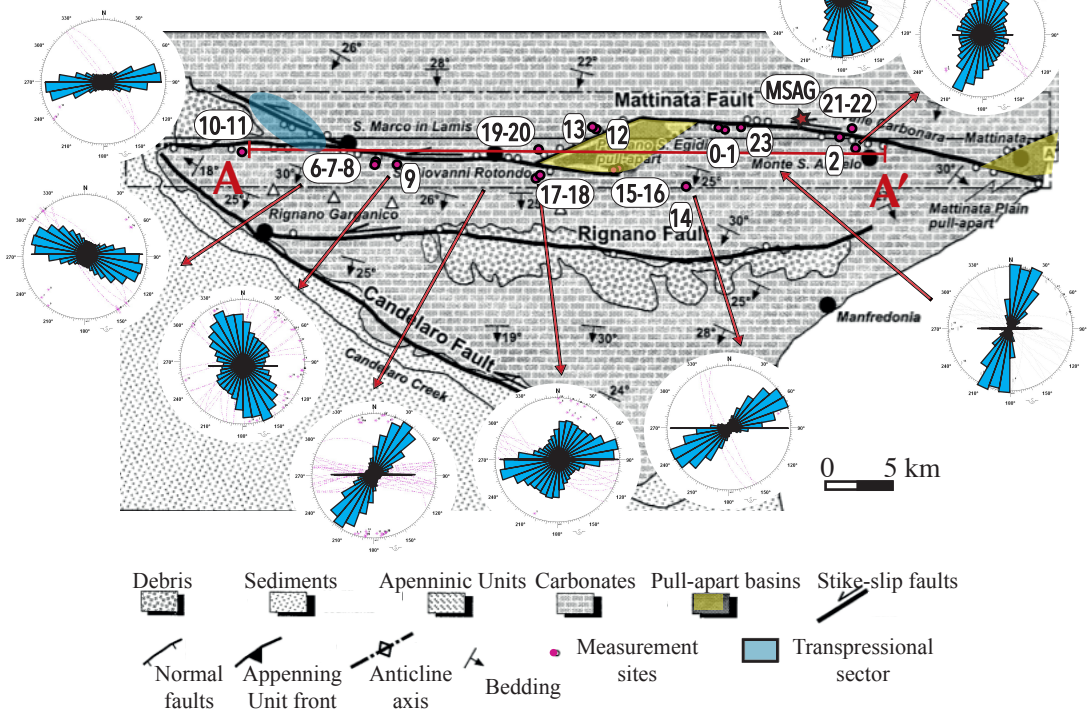

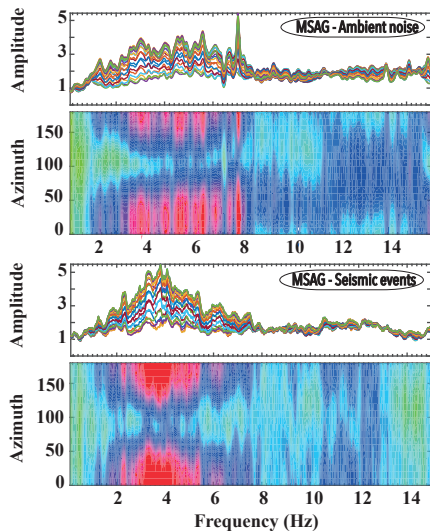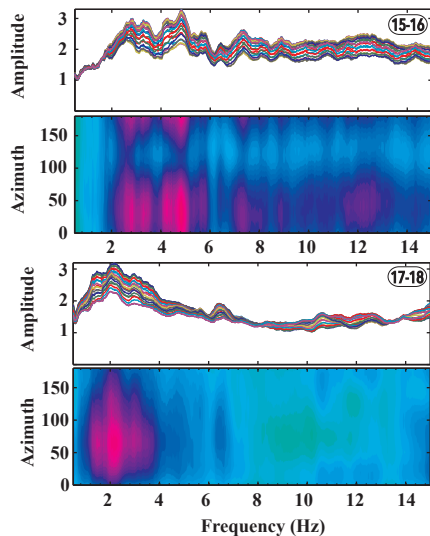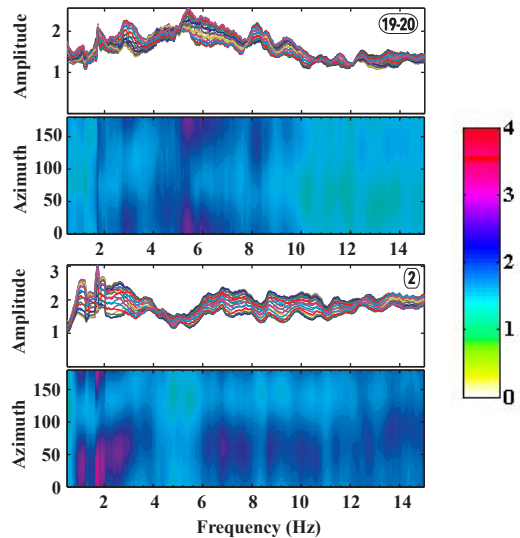

# CAMPO IMPERATORE FAULT

## HV SPECTRAL RATIOS

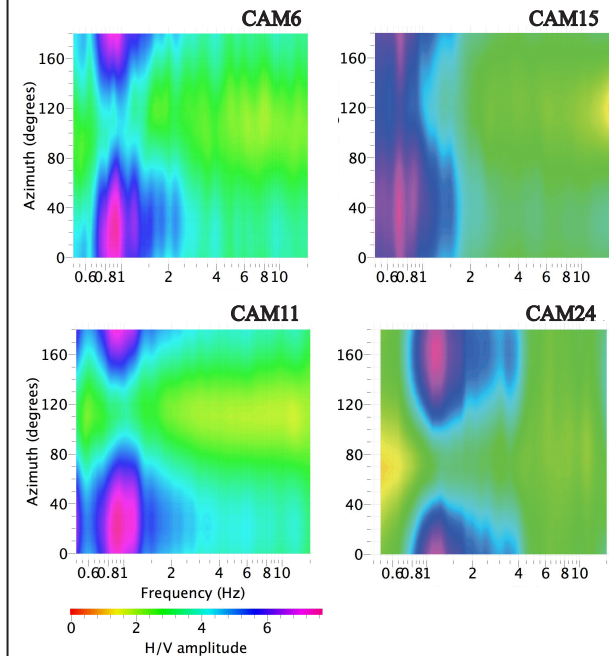

## TIME-FREQUENCY POLARIZATION ANALYSIS

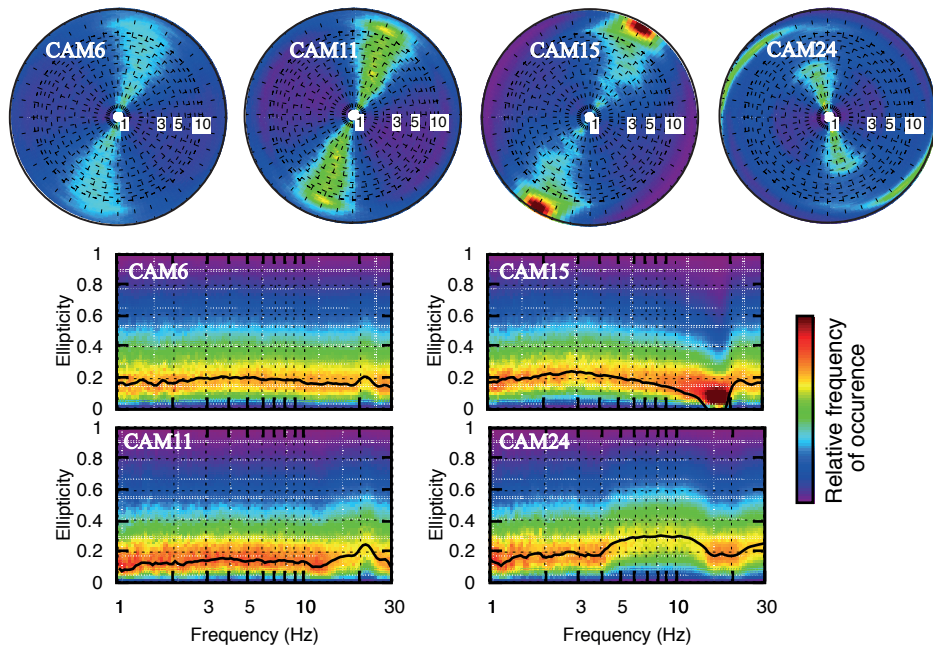

| #EventID | Date/Time      | Latitude  | Longitude  | Depth (km) | Magnitude | MagType | ND1 | ND2 | ND3 | ND4 | ND5 | ND6 | ND7 | NDR | C002 | C015 | C030 | C048 | C060 | CSU1 |
|----------|----------------|-----------|------------|------------|-----------|---------|-----|-----|-----|-----|-----|-----|-----|-----|------|------|------|------|------|------|
| 2854572  | 06/09/08 04:00 | 37.7772   | -121.9809  | 3.9        | 3.3       | MS      | *   | *   | *   | *   | *   | *   | *   | *   |      |      |      |      |      | *    |
| 2857185  | 10/10/08 23:19 | 37.837    | -122.215   | 12.7       | 3.1       | ML      | *   | *   | *   |     |     | *   | *   |     |      |      |      |      |      | *    |
| 2859900  | 10/11/08 19:56 | 37.434    | -121.775   | 10.0       | 3.2       | MW      | *   | *   | *   | *   | *   | *   | *   | *   |      |      |      |      |      | *    |
| 2861931  | 09/12/08 16:25 | 37.484    | -121.809   | 6.1        | 3.5       | ML      | *   | *   | *   | *   | *   | *   | *   | *   |      |      |      |      |      | *    |
| 2862866  | 21/12/08 17:35 | 36.6736   | -121.357   | 10.9       | 3.7       | mb      | *   | *   | *   | *   | *   | *   | *   | *   |      |      |      |      |      | *    |
| 2862878  | 21/12/08 20:09 | 36.677    | -121.304   | 6.5        | 3.6       | MW      |     |     | *   |     |     | *   |     |     |      |      |      |      |      | *    |
| 2866035  | 15/02/09 22:05 | 36.862    | -121.597   | 6.7        | 3.3       | ML      |     |     | *   |     |     | *   |     |     |      |      |      |      |      | *    |
| 2866271  | 21/02/09 19:01 | 37.626    | -121.95    | 11.8       | 3.2       | ML      | *   | *   | *   | *   | *   | *   | *   |     |      |      |      |      |      | *    |
| 3604803  | 26/02/09 16:08 | 36.863    | -121.599   | 6.7        | 3.2       | ML      | *   | *   | *   |     | *   | *   | *   |     |      |      |      |      |      | *    |
| 2866791  | 08/03/09 14:47 | 37.4656   | -121.8199  | 0.3        | 3.5       | MW      | *   | *   | *   | *   | *   | *   | *   |     |      |      |      |      |      | *    |
| 3638994  | 18/03/09 02:26 | 37.458    | -121.77    | 7.9        | 3.1       | ML      |     |     | *   |     |     | *   |     |     |      |      |      |      |      | *    |
| 2842899  | 07/01/10 18:09 | 37.3802   | -121.9062  | 10.0       | 4.2       | mb      | *   | *   | *   | *   | *   | *   | *   | *   | *    | *    | *    |      |      | *    |
| 2846204  | 07/03/10 06:14 | 36.8039   | -121.5507  | 11.5       | 3.6       | MW      |     | *   | *   | *   |     | *   | *   |     | *    |      | *    |      |      |      |
| 2873823  | 12/06/10 06:05 | 36.8154   | -121.7236  | 12.0       | 3.6       | MW      | *   | *   | *   |     | *   | *   |     |     | *    |      |      |      |      |      |
| 2877967  | 10/08/10 00:51 | 36.903    | -121.6506  | 9.6        | 4.3       | mb      | *   | *   |     | *   | *   | *   |     | *   | *    | *    |      |      |      |      |
| 3202945  | 15/10/10 11:04 | 37.88     | -121.388   | 14.7       | 3.6       | ml      |     |     |     | *   | *   | *   |     |     | *    | *    | *    |      |      |      |
| 3275752  | 08/01/11 00:10 | 37.1945   | -121.8403  | 16.0       | 4.2       | mb      | *   | *   |     | *   | *   | *   |     | *   | *    | *    | *    |      |      |      |
| 3278598  | 12/01/11 08:51 | 36.6609   | -121.5355  | 10.0       | 4.6       | mb      | *   | *   |     | *   | *   | *   |     | *   | *    | *    | *    |      |      |      |
| 3276247  | 13/01/11 03:54 | 36.802    | -121.54    | 7.4        | 3.7       | MW      | *   | *   |     |     |     |     |     |     | *    | *    | *    |      |      |      |
| 3275806  | 13/01/11 04:00 | 36.68     | -121.775   | 5.4        | 3.9       | MW      |     |     |     | *   | *   | *   |     | *   | *    | *    | *    |      |      |      |
| 3317197  | 06/07/11 07:18 | 36.6044   | -121.4418  | 15.9       | 3.8       | MW      |     |     |     |     |     |     |     |     | *    | *    |      |      |      |      |
| 3323648  | 24/08/11 06:36 | 37.7364   | -122.1739  | 10.1       | 3.6       | MW      | *   | *   | *   | *   | *   | *   | *   | *   | *    | *    | *    |      |      | *    |
| 3321093  | 27/08/11 07:18 | 36.5517   | -121.2362  | 12.1       | 4.8       | MW      | *   | *   | *   | *   | *   | *   | *   | *   |      |      | *    |      |      |      |
| 8891660  | 29/10/12 04:25 | 36.5784   | -121.1928  | 10.0       | 3.8       | mb      | *   | *   |     | *   |     | *   | *   | *   |      |      | *    |      |      |      |
| 9119547  | 28/06/13 03:52 | 36.7302   | -121.3996  | 10.0       | 3.9       | ML      |     |     |     |     |     |     |     |     | *    | *    |      | *    | *    |      |
| 4523848  | 02/12/13 10:05 | 36.9315   | -121.6172  | 13.7       | 3.8       | ML      |     |     |     |     |     |     |     |     | *    | *    |      |      | *    |      |
| 4807547  | 09/09/14 18:17 | 36.6455   | -121.3718  | 13.6       | 3.8       | ML      |     |     |     |     |     |     |     |     |      |      |      |      |      |      |
| 4815431  | 20/11/14 06:26 | 36.7774   | -121.6     | 5.8        | 4.0       | mb      |     |     |     |     |     |     |     |     | *    | *    |      | *    | *    |      |
| 10493684 | 06/12/14 02:16 | 36.7965   | -121.5122  | 8.0        | 3.9       | Mwr     |     |     |     |     |     |     |     |     | *    | *    |      | *    | *    |      |
| 5153257  | 21/07/15 09:41 | 37.5358   | -121.9993  | 11.1       | 4.2       | mb      |     |     |     |     |     |     |     |     | *    | *    |      | *    |      |      |
| 5188209  | 18/07/16 05:53 | 36.689833 | -121.32517 | 4.9        | 3.8       | mw      |     |     |     |     |     |     |     |     |      |      |      | *    |      |      |
| 10045822 | 31/03/17 10:55 | 36.877667 | -121.61417 | 6.2        | 4.0       | Mw      |     |     |     |     |     |     |     |     |      |      |      | *    |      |      |
| 10412386 | 10/10/17 00:53 | 37.3135   | -121.672   | 9.7        | 4.1       | mw      |     |     |     |     |     |     |     |     | *    | *    |      | *    |      |      |
| 10598569 | 27/12/17 06:32 | 37.3965   | -121.74683 | 10.6       | 3.8       | Mwr     |     |     |     |     |     |     |     |     | *    | *    |      |      |      |      |
| 10728437 | 16/04/18 16:39 | 37.434667 | -121.773   | 9.3        | 3.8       | Mwr     |     |     |     |     |     |     |     |     | *    | *    |      | *    |      |      |
| 10955894 | 05/10/18 13:29 | 36.753333 | -121.35367 | 11.4       | 3.8       | mw      |     |     |     |     |     |     |     |     |      | *    |      |      |      |      |
| 11076275 | 16/07/19 20:11 | 37.818667 | -121.75683 | 12.4       | 4.3       | Mw      |     |     |     |     |     |     |     |     | *    | *    |      |      |      |      |
| 11131881 | 15/10/19 05:33 | 37.938    | -122.057   | 14.0       | 4.5       | Mwr     |     |     |     |     |     |     |     |     | *    | *    |      |      |      |      |
